# Supplementary material for: Comprehensive analysis of tumor mutation burden and immune microenvironment in gastric cancer
Source: Oxford University Press journal article supplement (doi:10.1042/bsr20203336), 2021-01-26
Supplement: bsr-2020-3336_supp.pdf [file bsr-2020-3336_supp.pdf]

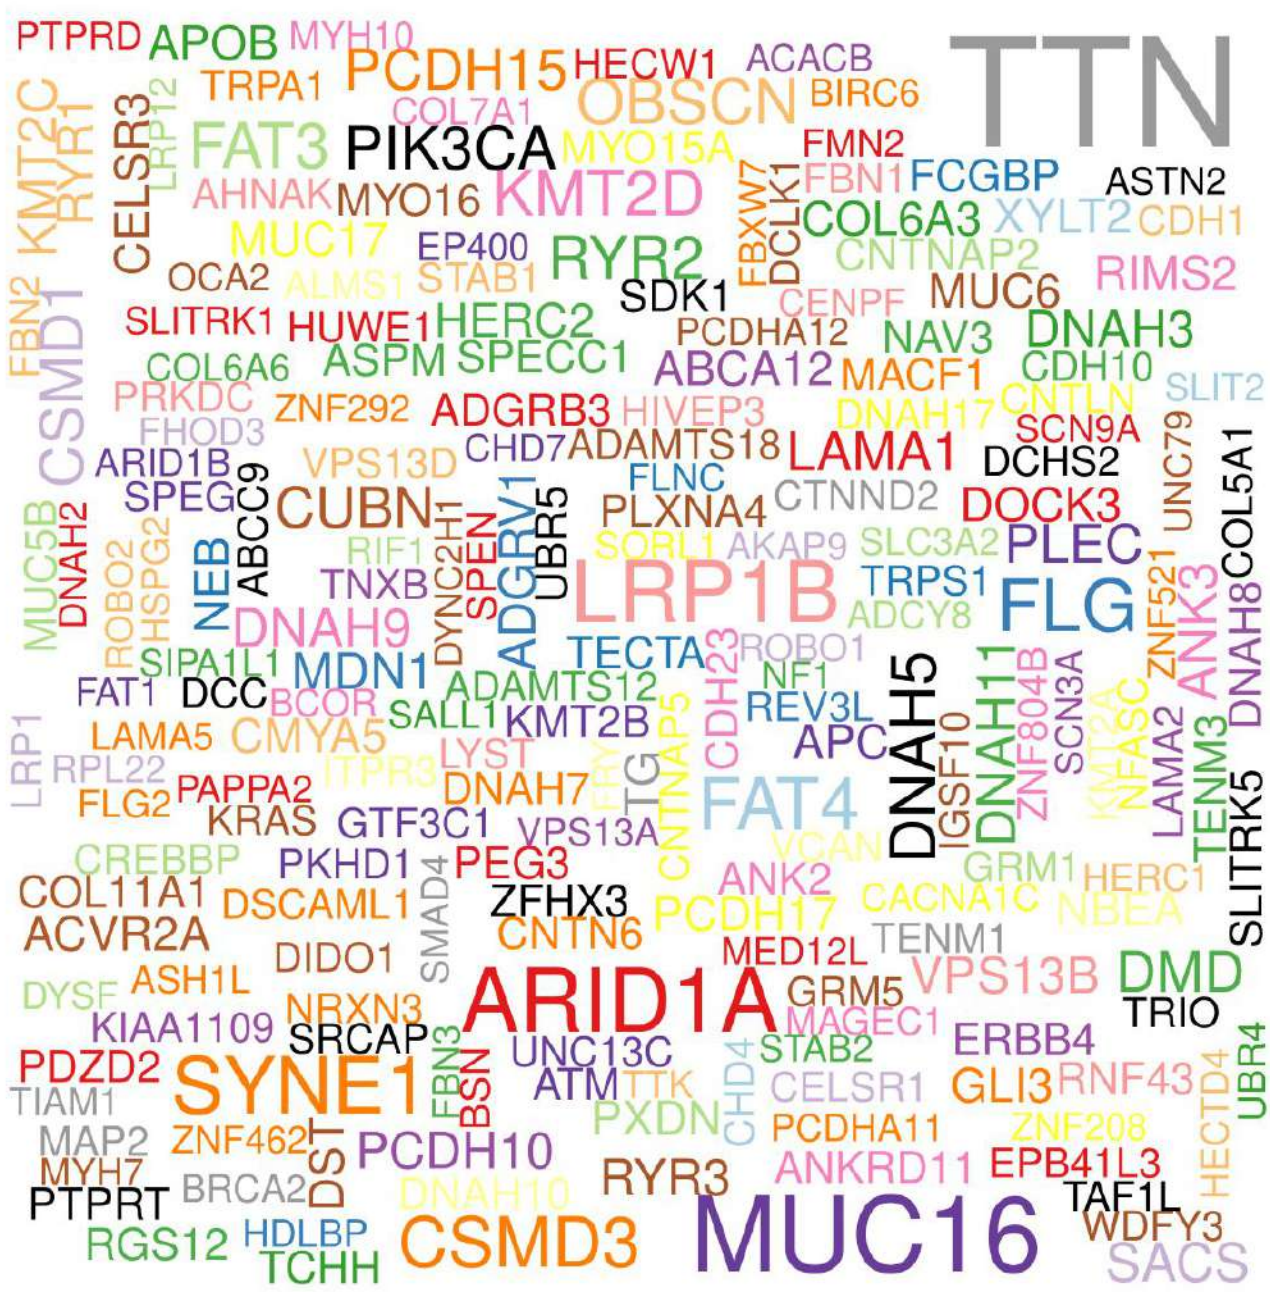

**A**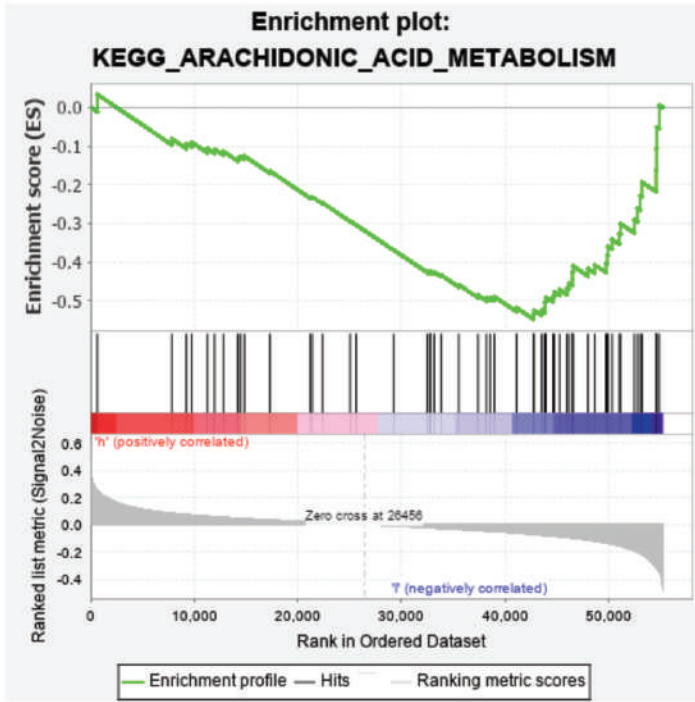**B**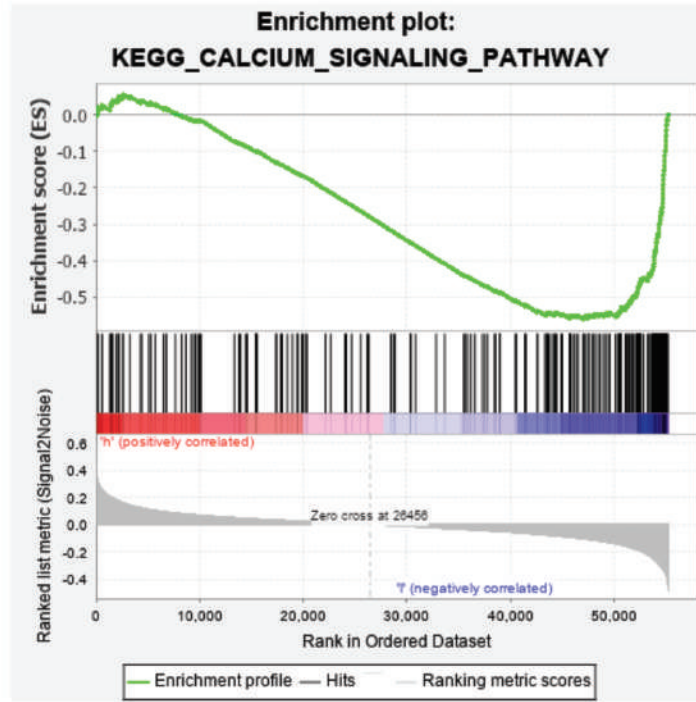**C**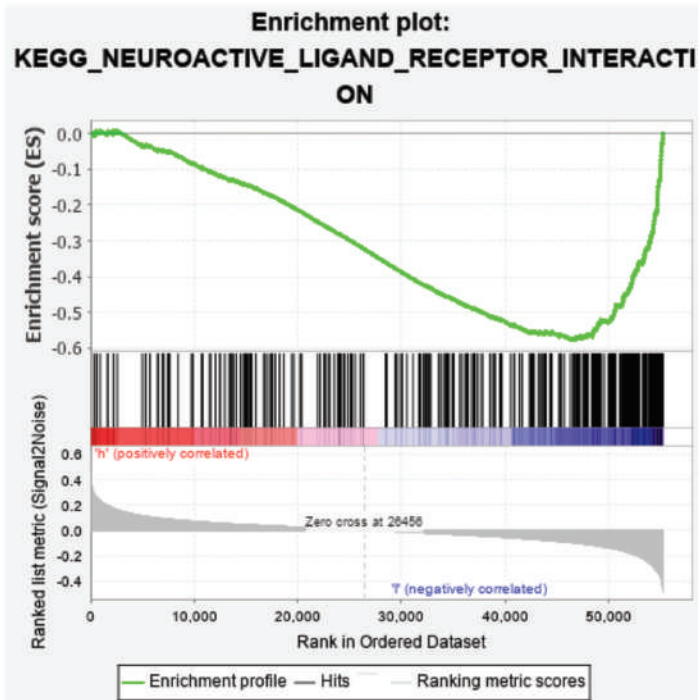**D**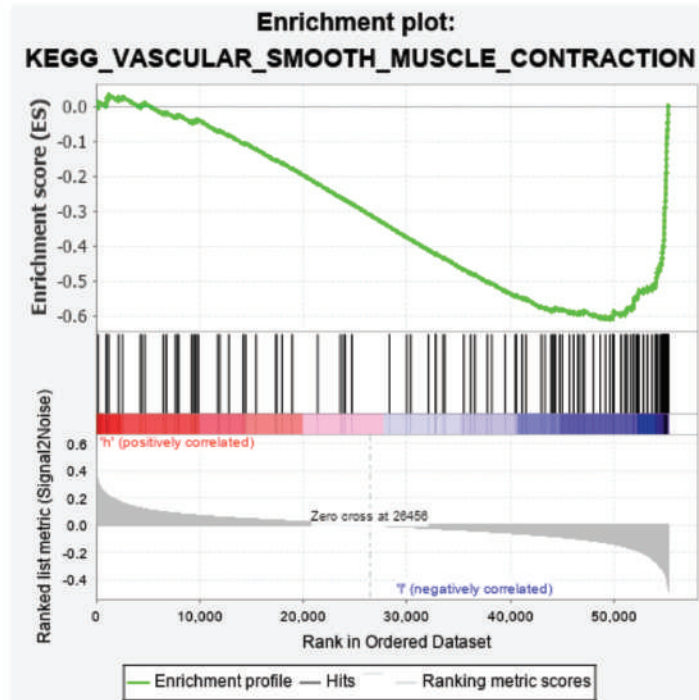

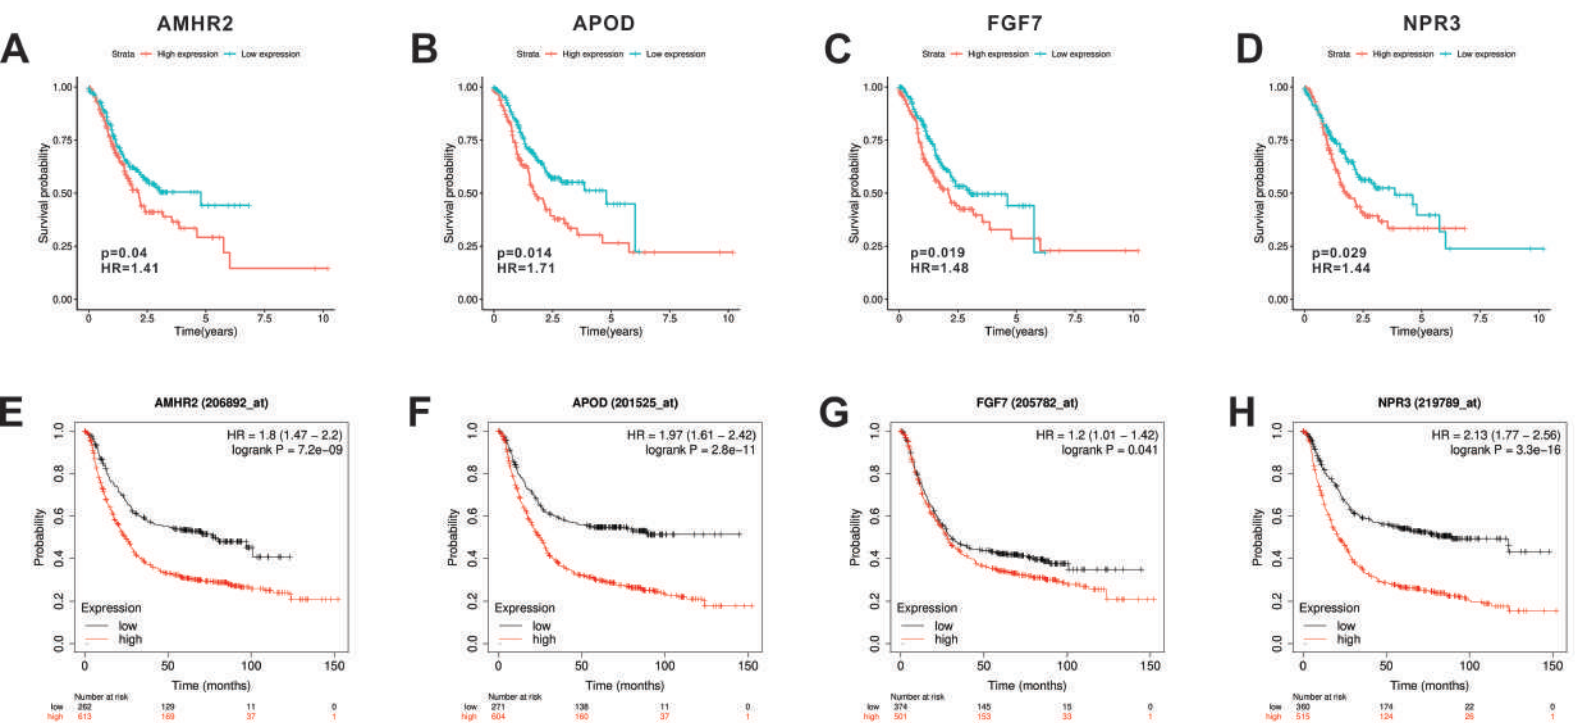

**A**

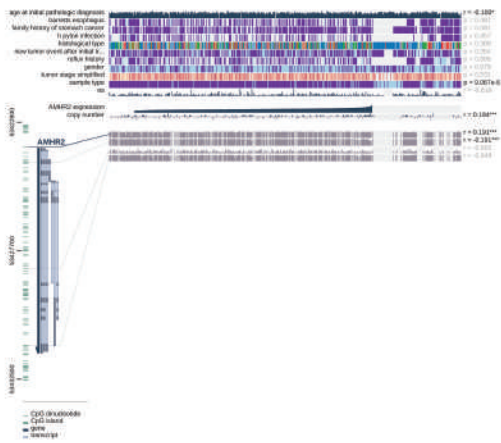

**B**

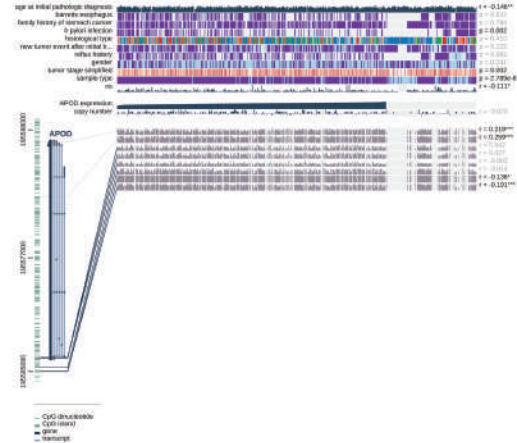

**C**

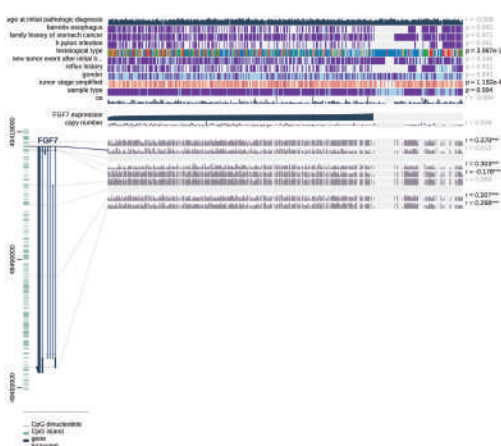

**D**

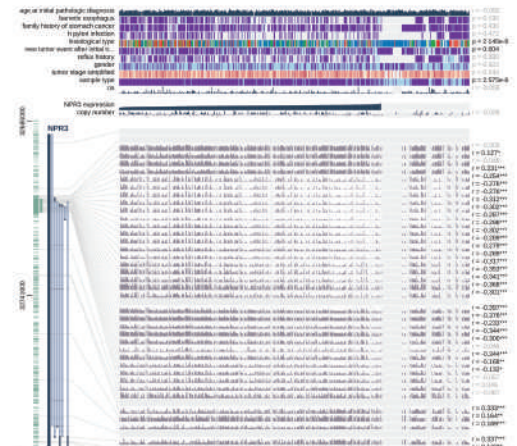

**Legend**

- barretts esophagus: no (dark blue), yes (light blue), null (grey)
- family history of stomach cancer: no (dark blue), yes (light blue), null (grey)
- h pylori infection: no (dark blue), yes (light blue), null (grey)
- histological type: stomach adenocarcinoma, signet ring type (dark blue), stomach, adenocarcinoma, diffuse type (medium blue), stomach, adenocarcinoma, not otherwise specified (nos) (light blue), stomach, intestinal adenocarcinoma, mucinous type (green)
- new tumor event after initial tr.: no (dark blue), yes (light blue), null (grey)
- reflux history: no (dark blue), yes (light blue), null (grey)
- gender: female (dark blue), male (light blue), null (grey)
- tumor stage simplified: stage 1 (dark blue), stage 2 (medium blue), stage 3 (light blue), stage 4 (green), null (grey)
- sample type: primary tumor (dark blue), solid tissue normal (light blue), null (grey)
- copy number: -2: homozygous deletion (dark blue), -1: single copy deletion (medium blue), 0: diploid normal (light blue), +1: low-level amplification (green), +2: high-level amplification (red)
- statistics: >= 0.05 (dark blue), \* p < 0.05 (medium blue), \*\* p < 0.01 (light blue), \*\*\* p < 0.001 (green)
